# Supplementary material
Source: HighWire-hosted journal article supplement (https://erj.ersjournals.com/content/49/2/1601770)
Supplement: inline-supplementary-material-3 [file inline-supplementary-material-3.pdf]

Supplemental Table E2. Reasons for declining study participation

| Reason to decline participation                    | Number |
|----------------------------------------------------|--------|
| Personal reason, unspecified                       | 26     |
| Time spent (study visits / daily study medication) | 11     |
| Distance to hospital for study visits              | 12     |
| Not willing to wash-out/stop hypertonic saline     | 12     |
| Don't believe it may help                          | 3      |
| Feel too ill to alter current medication           | 3      |
| Not willing to wash-out/stop acetylcysteine        | 1      |
| Emmigration                                        | 1      |
