# Supplementary material
Source: HighWire-hosted journal article supplement (https://erj.ersjournals.com/content/49/2/1601770)
Supplement: inline-supplementary-material-4 [file inline-supplementary-material-4.pdf]

Supplemental Table E3. Secondary endpoints.

| Secondary endpoint<br>Median [IQR]  | HS       |              |                 |             | Control  |              |                 |              | P-value |
|-------------------------------------|----------|--------------|-----------------|-------------|----------|--------------|-----------------|--------------|---------|
|                                     | Baseline |              | Change 0-12 wks |             | Baseline |              | Change 0-12 wks |              |         |
| <b>SGRQ (0-100) 100 being worst</b> |          |              |                 |             |          |              |                 |              |         |
| Total                               | 41,8     | [32,7-56,2]  | -2,6            | [-9,0-1,5]  | 36,4     | [28,4-59,1]  | -0,3            | [-8,2-6,1]   | 0.33    |
| Activity                            | 59,9     | [41,5-70,5]  | -5,5            | [-17,7-0,2] | 55,7     | [31,0-70,9]  | 0,0             | [-13,9-5,6]  | 0.38    |
| Symptoms                            | 56,8     | [40,2-74,4]  | -2,7            | [-11,5-0,7] | 59,0     | [43,2-72,1]  | 0,0             | [-4,8-5,5]   | 0.28    |
| Impact                              | 30,1     | [18,1-41,9]  | -2,2            | [-9,7-0,8]  | 28,1     | [18,6-42,8]  | -3,3            | [-9,6-7,6]   | 0.25    |
|                                     |          |              |                 |             |          |              |                 |              |         |
| <b>QoL-B (0-100) 0 being worst</b>  |          |              |                 |             |          |              |                 |              |         |
| Role Functioning                    | 66,7     | [46,7-86,7]  | 0,0             | [0,0-15,0]  | 73,3     | [66,7-90,4]  | -6,7            | [-13,3-6,7]  | 0.05    |
| Vitality                            | 44,4     | [27,8-55,6]  | 11,1            | [0,0-22,2]  | 44,4     | [36,1-55,6]  | 0,0             | [-11,1-11,1] | 0.15    |
| Emotional Functioning               | 83,3     | [75,0-91,7]  | 4,1             | [-8,3-8,3]  | 91,7     | [75,0-100,0] | -8,3            | [-16,7-0,0]  | 0.16    |
| Health Perception                   | 41,7     | [29,2-58,3]  | 8,3             | [0,0-10,4]  | 50,0     | [41,7-58,3]  | -8,3            | [-16,7-8,3]  | 0.03*   |
| Physical Functioning                | 53,3     | [26,7-73,3]  | 0,0             | [-6,7-20,0] | 63,3     | [28,3-88,3]  | -6,7            | [-20,0-6,7]  | 0.10    |
| Treatment Burden                    | 55,6     | [44,4-77,8]  | 0,0             | [-5,6-11,1] | 77,8     | [55,6-100]   | -11,1           | [-33,3-11,1] | 0.10    |
| Respiratory Symptoms                | 48,1     | [31,5-64,8]  | 11,1            | [-3,7-25,2] | 55,6     | [29,6-59,3]  | 0,0             | [-3,7-11,1]  | 0.36    |
| Social Functioning                  | 75,0     | [58,3-83,3]  | 0,0             | [-8,3-8,3]  | 75,0     | [50,0-83,3]  | 0,0             | [-8,3-8,3]   | 0.68    |
|                                     |          |              |                 |             |          |              |                 |              |         |
| <b>Modified LTRI-VAS (0-10)</b>     |          |              |                 |             |          |              |                 |              |         |
| Dyspnea                             | 4,2      | [1,7-5,8]    | -0,4            | [-2,9-0,6]  | 3,9      | [1,3-5,7]    | 0,4             | [-0,2-1,2]   | 0.19    |
| Cough                               | 5,0      | [3,7-6,8]    | -0,8            | [-3,4-0,8]  | 5,3      | [3,0-6,5]    | 0,2             | [-1,0-2,3]   | 0.18    |
| Fatigue                             | 5,6      | [4,3-7,8]    | -1,1            | [-3,0-0,7]  | 4,9      | [2,3-5,9]    | 0,8             | [-1,5-1,8]   | 0.09    |
| Chest pain                          | 1,3      | [0,1-3,9]    | -0,4            | [-1,7-0,2]  | 0,9      | [0,2-2,2]    | 0,0             | [-0,4-0,9]   | 0.03*   |
| Ease of sputum expectoration        | 2,1      | [1,4-4,7]    | 0,1             | [-2,2-0,9]  | 2,3      | [0,4-4,1]    | 0,0             | [-1,7-2,0]   | 0.93    |
|                                     |          |              |                 |             |          |              |                 |              |         |
| <b>Lung function (% pred.)</b>      |          |              |                 |             |          |              |                 |              |         |
| FVC                                 | 91,0     | [83,0-106,0] | -0,5            | [-3,0-3,0]  | 93,5     | [82,5-105,0] | -2,0            | [-3,0-2,0]   | 0.36    |
| FEV1                                | 75,0     | [57,5-94,0]  | 1,5             | [-3,5-4,3]  | 86,0     | [55,0-93,8]  | 0,0             | [-3,0-2,0]   | 0.22    |
| FEF <sub>25-75</sub>                | 35,0     | [25,3-61,3]  | 2,0             | [-4,5-4,5]  | 45,0     | [26,5-75,3]  | 1,0             | [-8,3-3,5]   | 0.48    |

Numerical data are expressed as a median value with interquartile range. \*: p-value <0.05. HS: hypertonic saline; IQR: interquartile range; QoL-B: Quality of Life Bronchiectasis questionnaire; LTRI-VAS: lower respiratory tract infection visual analogue scale; % pred.: % of predicted value; FVC: forced vital capacity; FEV1: forced expiratory volume in 1 second; FEF<sub>25-75</sub>: forced expiratory flow 25-75%.

Supplemental Table E3. Secondary endpoints (continued).

| Secondary endpoint<br>Median [IQR]      | HS       |              |                 |              | Control  |              |                 |             | P-value |
|-----------------------------------------|----------|--------------|-----------------|--------------|----------|--------------|-----------------|-------------|---------|
|                                         | Baseline |              | Change 0-12 wks |              | Baseline |              | Change 0-12 wks |             |         |
| <b>Blood</b>                            |          |              |                 |              |          |              |                 |             |         |
| CRP                                     | 0,4      | [0,0-6,0]    | 0,0             | [-0,5-1,6]   | 4,0      | [0,0-7,9]    | 0,0             | [-4,0-0,0]  | 0.16    |
| ESR                                     | 8,0      | [3,0-11,5]   | 0,0             | [-2,3-4,5]   | 7,5      | [2,0-18,3]   | 0,0             | [-2,0-1,0]  | 0.29    |
| WBC                                     | 8,6      | [7,5-11,8]   | -0,4            | [-1,8-0,5]   | 8,6      | [7,3-10,0]   | -0,2            | [-1,1-0,7]  | 0.25    |
| Neutrophils                             | 5,4      | [4,4-7,4]    | -0,1            | [-1,2-0,3]   | 4,8      | [3,9-6,6]    | 0,1             | [-1,1-0,7]  | 0.30    |
| Eosinophils                             | 0,1      | [0,1-0,2]    | 0,0             | [0,0-0,1]    | 0,1      | [0,1-0,2]    | 0,0             | [-0,1-0,0]  | 0.12    |
| Basophils                               | 0,1      | [0,0-0,1]    | 0,0             | [0,0-0,0]    | 0,1      | [0,0-0,1]    | 0,0             | [0,0-0,0]   | 0.66    |
| Lymphocytes                             | 2,4      | [2,1-2,8]    | -0,1            | [-0,5-0,2]   | 2,2      | [2,0-2,9]    | -0,1            | [-0,3-0,2]  | 0.49    |
| Monocytes                               | 0,6      | [0,5-0,8]    | -0,1            | [-0,2-0,1]   | 0,6      | [0,6-0,8]    | 0,0             | [-0,1-0,1]  | 0.29    |
|                                         |          |              |                 |              |          |              |                 |             |         |
| <b>Sputum cell differentiation (%)§</b> |          |              |                 |              |          |              |                 |             |         |
| Neutrophils                             | 91,5     | [62,5-96,6]  | 2,9             | [0,0-8,3]    | 92,2     | [78,1-97,9]  | 0,9             | [-0,1-4,3]  | 0.94    |
| Eosinophils                             | 0,4      | [0,0-0,5]    | -0,1            | [-0,3-0,4]   | 0,2      | [0,1-0,6]    | 0,0             | [-0,2-0,3]  | 0.94    |
| Lymphocytes                             | 0,8      | [0,6-1,5]    | 0,0             | [-0,9-0,8]   | 0,8      | [0,4-1,9]    | 0,2             | [-0,4-0,9]  | 0.43    |
| Macrophages                             | 5,9      | [2,3-35,9]   | -3,2            | [-10,8-0,0]  | 6,5      | [1,3-14,8]   | -1,0            | [-4,5-0,5]  | 0.75    |
|                                         |          |              |                 |              |          |              |                 |             |         |
| <b>Sputum cytokines</b>                 |          |              |                 |              |          |              |                 |             |         |
| IL-1β (ng/ml)                           | 0,6      | [0,01-4,1]   | -0,1            | [-1,1-0,4]   | 1,0      | [0,2-5,2]    | -0,1            | [-1,5-0,0]  | 0.98    |
| IL-6 (ng/ml)                            | 2,8      | [0,9-4,7]    | -0,5            | [-1,3-1,9]   | 3,8      | [2,0-4,9]    | -0,5            | [-1,3-0,4]  | 0.06    |
| IL-8 (ng/ml)                            | 13,7     | [7,8-34,1]   | -3,6            | [-7,2-21,7]  | 24,2     | [9,3-40,0]   | -6,1            | [-18,9-2,1] | 0.76    |
| IL-10 (pg/ml)                           | 66,2     | [20,3-177,8] | -1,1            | [-44,6-86,0] | 117,9    | [31,2-215,3] | -10,3           | [-49,2-2,2] | 0.10    |
| TNF-α (ng/ml)                           | 0,3      | [0,05-1,4]   | 0,0             | [-0,7-0,3]   | 0,5      | [0,1-1,6]    | 0,0             | [-1,0-0,0]  | 0.52    |
| NE (ng/ml)                              | 7,9      | [1,9-72,7]   | -0,4            | [-4,1-5,9]   | 31,4     | [2,5-66,4]   | -5,7            | [-27,4-0,8] | 0.10    |
| MPO (ug/ml)                             | 9,2      | [2,4-102,1]  | -1,3            | [-38,8-2,9]  | 26,2     | [3,6-65,7]   | -5,1            | [-26,8-0,4] | 0.90    |
| IFN-α (pg/ml)                           | 38,7     | [8,6-91,6]   | -4,0            | [-23,5-23,5] | 68,4     | [22,6-107,7] | -11,4           | [-18,5-0,6] | 0.18    |
| IFN-β (ng/ml)                           | 6,5      | [1,6-28,4]   | -0,7            | [-5,8-6,1]   | 12,8     | [3,3-27,8]   | -0,9            | [-10,0-0,3] | 0.10    |

Numerical data are expressed as a median value with interquartile range. §: basophils, mast cells, plasma cells and monocytes were detected in too small numbers to show; HS: hypertonic saline; IQR: interquartile range; CRP: C-reactive protein; ESR: erythrocyte sedimentation rate; WBC: white blood cell count; IL-1 $\beta$ : interleukin-1 beta; IL-6: interleukin-6; IL-8: interleukin-8; IL-10: interleukin-10; TNF- $\alpha$ : tumor necrosis factor alpha; NE: neutrophil elastase; MPO: myeloperoxidase; IFN- $\alpha$ : interferon alpha; IFN- $\beta$ : interferon beta.
