# Supplementary material
Source: HighWire-hosted journal article supplement (https://erj.ersjournals.com/content/49/2/1601770)
Supplement: inline-supplementary-material-5 [file inline-supplementary-material-5.pdf]

Supplemental Table E4. Activities in which participants feel most impaired because of their respiratory symptoms (SGRQ open-ended question)

| Activities                                                                                                    | N, % of participants |
|---------------------------------------------------------------------------------------------------------------|----------------------|
| Sports (examples given: cycling, running, softball, swimming, dancing)                                        | 19 (86,4%)           |
| Daily activities (examples given: grocery shopping, housekeeping, gardening, climbing stairs, lifting things) | 10 (45,5%)           |
| Going out (examples given: going out to dinner, going to a party, being in a smoky room)                      | 12 (54,5%)           |
| Work                                                                                                          | 6 (27,3%)            |
