# Supplementary material
Source: HighWire-hosted journal article supplement (https://erj.ersjournals.com/content/49/2/1601770)
Supplement: inline-supplementary-material-6 [file inline-supplementary-material-6.pdf]

Supplemental Table E5. Observed mean differences, standard deviations and within-patient correlation for the primary and secondary outcomes.

| Outcome                      | MCID | Observed mean difference<br>[ i.e. ( $\Delta$ HS) - ( $\Delta$ control)] | Observed SD | Observed correlation |
|------------------------------|------|--------------------------------------------------------------------------|-------------|----------------------|
| SGRQ Total                   | 4    | -3,5                                                                     | 16,5        | 0,84                 |
| SGRQ_Activity                | 4    | -5,3                                                                     | 21,1        | 0,83                 |
| SGRQ_Symptoms                | 4    | -3,7                                                                     | 19,9        | 0,58                 |
| SGRQ_Impact                  | 4    | -2,4                                                                     | 19,8        | 0,83                 |
| QoLB Role Functioning        | 8    | 12,1                                                                     | 25,3        | 0,35                 |
| QoLB Vitality                | 10   | 11,7                                                                     | 38,4        | -0,09                |
| QoLB Emotional Functioning   | 7    | 3,7                                                                      | 32,0        | 0,64                 |
| QoLB Health Perception       | 8    | 10,2                                                                     | 18,9        | 0,66                 |
| QoLB Physical Functioning    | 10   | 11,9                                                                     | 32,1        | 0,88                 |
| QoLB Treatment Burden        | 9    | 8,3                                                                      | 12,9        | 0,71                 |
| QoLB Respiration Symptoms    | 8    | 3,9                                                                      | 28,3        | 0,64                 |
| QoLB Social Functioning      | 9    | -0,6                                                                     | 19,3        | 0,85                 |
| LTRI VAS Dyspnea             |      | -0,9                                                                     | 3,3         | 0,25                 |
| LTRI VAS Cough               |      | -1,3                                                                     | 3,9         | 0,39                 |
| LTRI VAS Fatigue             |      | -1,6                                                                     | 3,6         | 0,57                 |
| LTRI VAS Chest pain          |      | -1,9                                                                     | 4,8         | 0,39                 |
| LTRI VAS Ease of sputum exp. |      | -0,8                                                                     | 5,1         | 0,01                 |
| FVC (% pred.)                |      | 1,5                                                                      | 5,6         | 0,97                 |
| FEV1 (% pred.)               |      | 1,2                                                                      | 6,3         | 0,96                 |
| FEF25-75 (% pred.)           |      | 1,6                                                                      | 13,0        | 0,95                 |
| CRP (mg/liter)               |      | 3,5                                                                      | 19,4        | 0,97                 |
| ESR (mm/hour)                |      | 2,3                                                                      | 9,8         | 0,94                 |
| WBC (x10e9/L)                |      | -1,1                                                                     | 3,5         | 0,80                 |
| Neutrophils (x10e9/L)        |      | -0,9                                                                     | 3,4         | 0,78                 |
| Eosinophils (x10e9/L)        |      | 0,1                                                                      | 0,2         | 0,17                 |
| Basophils (x10e9/L)          |      | 0,0                                                                      | 0,0         | 0,54                 |
| Lymphocytes (x10e9/L)        |      | -0,2                                                                     | 0,7         | 0,37                 |
| Monocytes (x10e9/L)          |      | -0,1                                                                     | 0,2         | 0,47                 |
| Sputum Neutrophils (%)       |      | 1,8                                                                      | 16,6        | 0,67                 |
| Sputum Eosinophils (%)       |      | 0,6                                                                      | 2,1         | 0,81                 |
| Sputum Lymphocytes (%)       |      | -0,3                                                                     | 1,8         | 0,38                 |
| Sputum Macrophages (%)       |      | -2,2                                                                     | 16,4        | 0,42                 |
| Sputum IL-1 $\beta$ ng/ml    |      | 0,6                                                                      | 5,1         | 0,96                 |
| Sputum IL6 ng/ml             |      | -0,4                                                                     | 6,3         | 0,81                 |
| Sputum IL-8 ng/ml            |      | 50,6                                                                     | 115,1       | -0,16                |
| Sputum IL-10 pg/ml           |      | 51,1                                                                     | 165,5       | 0,73                 |
| Sputum TNF- $\alpha$ ng/ml   |      | -0,3                                                                     | 2,4         | 0,90                 |
| Sputum NE ng/ml              |      | 16,8                                                                     | 31,0        | 0,34                 |
| Sputum MPO $\mu$ g/ml        |      | 1,4                                                                      | 45,9        | 0,84                 |
| Sputum IFN- $\alpha$ pg/ml   |      | 10,8                                                                     | 60,3        | 0,77                 |
| Sputum IFN- $\beta$ ng/ml    |      | 9,1                                                                      | 52,2        | 0,028                |

MCID: minimal clinically important difference; HS: hypertonic saline; SD: standard deviation; SGRQ: St. George's Respiratory Questionnaire; QoL-B: Quality of Life Bronchiectasis questionnaire; LTRI-VAS: lower respiratory tract infection visual analogue scale; % pred.: % of predicted value; FVC:

forced vital capacity; FEV1: forced expiratory volume in 1 second; FEF25-75: forced expiratory flow 25-75%. CRP: C-reactive protein; ESR: erythrocyte sedimentation rate; WBC: white blood cell count; IL-1 $\beta$ : interleukin-1 beta; IL-6: interleukin-6; IL-8: interleukin-8; IL-10: interleukin-10; TNF- $\alpha$ : tumor necrosis factor alpha; NE: neutrophil elastase; MPO: myeloperoxidase; IFN- $\alpha$ : interferon alpha; IFN- $\beta$ : interferon beta.
